# Supplementary material
Source: PubMed Central journal article supplement (PMC2098815)

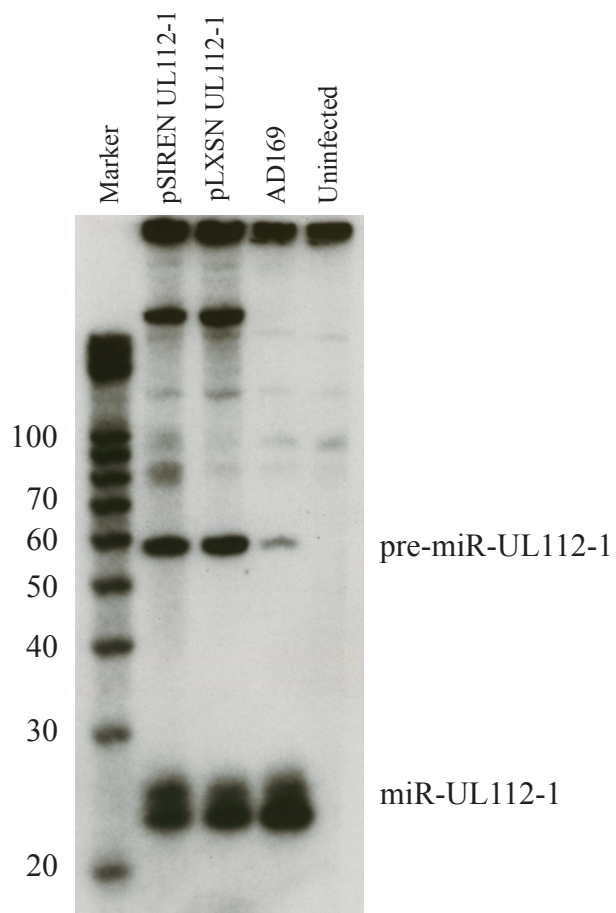

Supplement: ppat.0030163.sg001.pdf [file ppat.0030163.sg001.pdf]

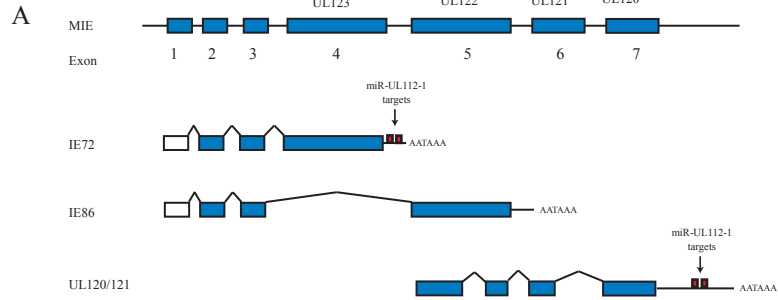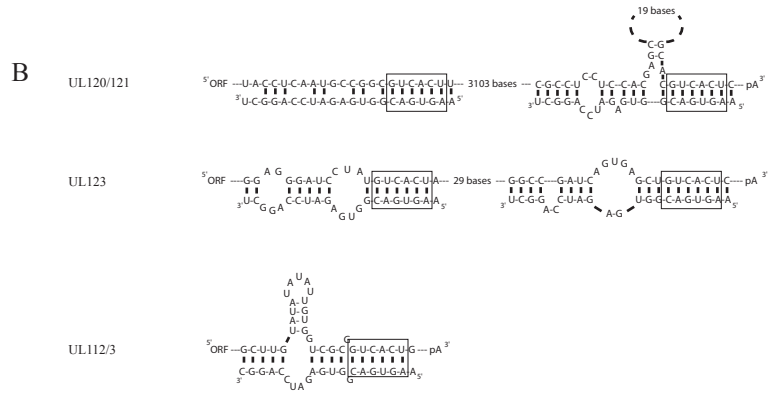

Supplement: ppat.0030163.sg002.pdf [file ppat.0030163.sg002.pdf]

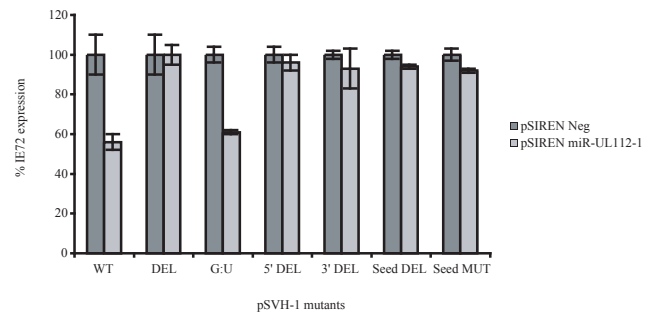

Supplement: ppat.0030163.sg003.pdf [file ppat.0030163.sg003.pdf]

Lamin  
siRNA

syn miR  
UL112-1

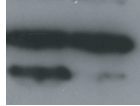

IE86

IE72

Supplement: ppat.0030163.sg004.pdf [file ppat.0030163.sg004.pdf]
